# Supplementary material for: Biological Tissue-Inspired Ultrasoft, Ultrathin, and Mechanically Enhanced Microfiber Composite Hydrogel for Flexible Bioelectronics
Source: PubMed Central journal article supplement (PMC10225432; doi:10.1007/s40820-023-01096-4), 2023-05-28
Supplement: 40820_2023_1096_MOESM1_ESM.pdf [file 40820_2023_1096_MOESM1_ESM.pdf]

Supporting Information for

## Biological Tissue-Inspired Ultrasoft, Ultrathin, and Mechanically Enhanced Microfiber Composite Hydrogel for Flexible Bioelectronics

Qiang Gao<sup>1</sup>, Fuqin Sun<sup>1</sup>, Yue Li<sup>1</sup>, Lianhui Li<sup>1</sup>, Mengyuan Liu<sup>1</sup>, Shuqi Wang<sup>1</sup>, Yongfeng Wang<sup>1</sup>, Tie Li<sup>1</sup>, Lin Liu<sup>1</sup>, Simin Feng<sup>1</sup>, Xiaowei Wang<sup>1</sup>, Seema Agarwal<sup>2</sup>, Ting Zhang<sup>1,3,4,\*</sup>

<sup>1</sup> i-Lab, Nano-X Vacuum Interconnected Workstation, Key Laboratory of Multifunction Nanomaterials and Smart Systems, Suzhou Institute of Nano-Tech and Nano-Bionics (SINANO), Chinese Academy of Sciences (CAS), Suzhou, Jiangsu, 215123, P. R. China

<sup>2</sup> Bavarian Center for Battery Technology (BayBatt), Bayreuth Center for Colloids and Interfaces, and Bavarian Polymer Institute, Macromolecular Chemistry II, Department of Chemistry, University of Bayreuth, Universitätsstrasse 30, Bayreuth, 95440, Germany

<sup>3</sup> School of Nano-Tech and Nano-Bionics, University of Science and Technology of China, Hefei, Anhui, 230026, P. R. China

<sup>4</sup> Center for Excellence in Brain Science and Intelligence Technology, Chinese Academy of Science, Shanghai, 200031, P. R. China

\* Corresponding author. E-mail: [tzhang2009@sinano.ac.cn](mailto:tzhang2009@sinano.ac.cn) (Ting Zhang)

### Supplementary Figures and Tables

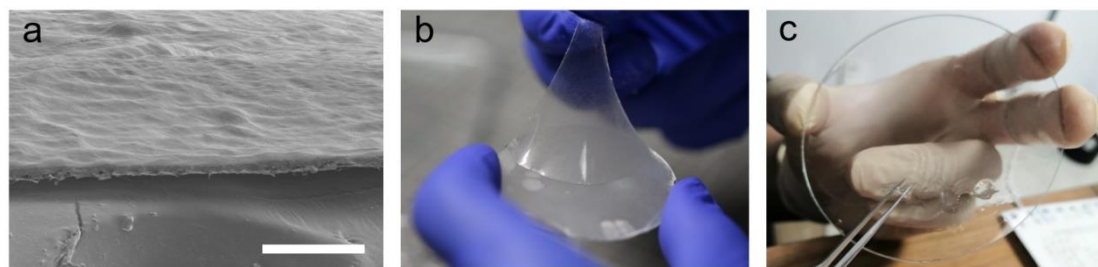

**Fig. S1** **a** SEM image displayed the cross-section of PVA/MF-CH. **b** Digital image of stretched PVA/MF-CH. The microfiber network was used with one of electrospinning 5 min. The spinning coating parameters were used as follows, rotation rate 1.0 k, time 10 s. The freeze-thaw cycle was 4 times. **c** Digital image of The PVA hydrogel processed with the same parameters with PVA/MF-CH in **b**.

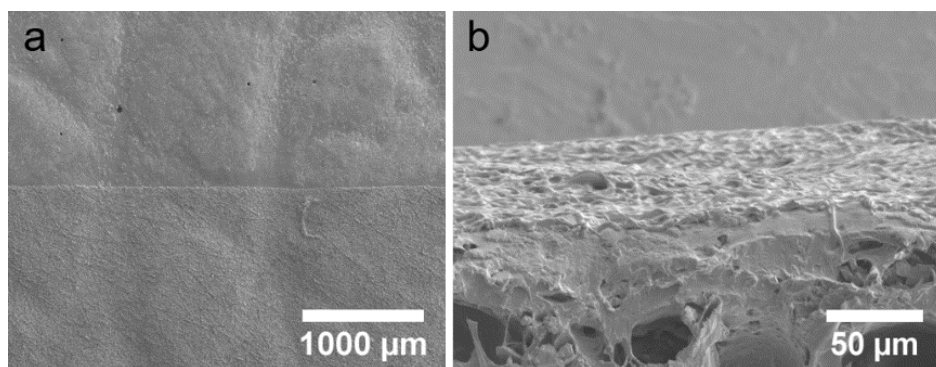

**Fig. S2** SEM images of artificial skin covered by PVA/MF-CH. **a** surface morphology, **b** cross-section

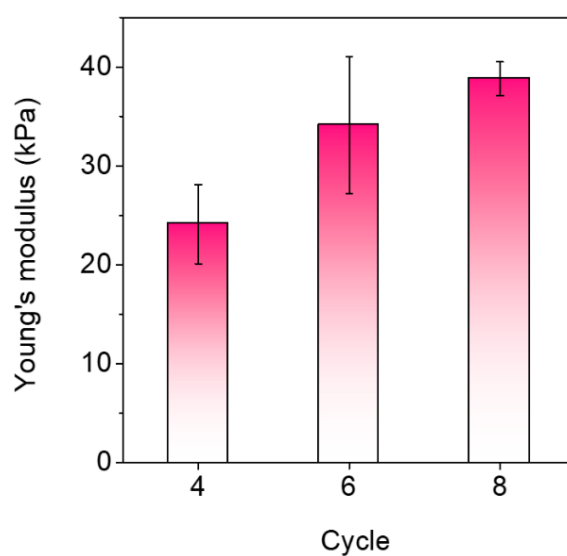

**Fig. S3** Young's modulus of PVA hydrogel with different freeze-thaw cycles

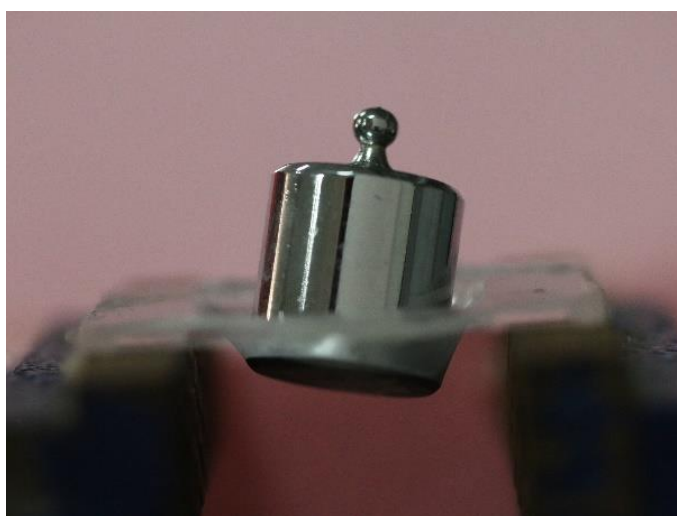

**Fig. S4** Digital image of PVA/MF-CH (thickness of  $\sim 7 \mu\text{m}$ ) holding an object of 20 g. The microfiber network was used with one of electrospinning for 8 min and the freeze-thaw cycle was 4 times

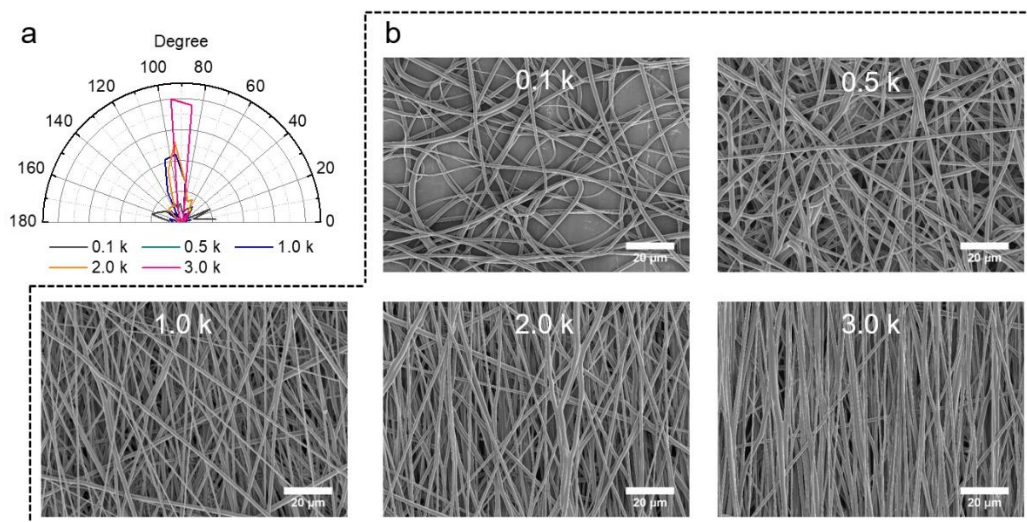

**Fig. S5** **a** Anisotropic properties of microfiber networks collected with different rotation rates. **a** Statistic of microfiber orientation. 100 fibers were randomly selected from SEM images with Image J software. **b** SEM images of microfiber network collected with different rotation rates. Note that these microfibers were collected by a rotating drum instead of a plate collector. The orientation degree of the fiber alignment increases with the increase in rotation rate. The fibers collected under a low rotation rate ( $< 1.0$  k) present random orientation. When the rotation rate of the drum increases to 3.0 k, the fibers are highly aligned in one direction.

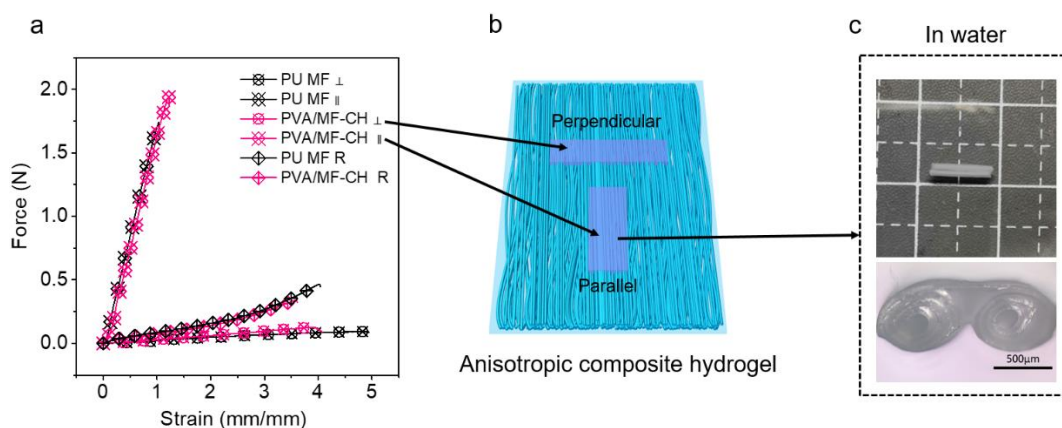

**Fig. S6** **a** Force-strain curves of PVA/MF-CH and PU microfiber film with different fiber alignments.  $\perp$  means that the stretching direction is perpendicular to fiber orientation direction.  $\parallel$  means that stretching direction is parallel with fiber orientation direction. R means random orientation. **b** Schematic diagram of the anisotropic composite hydrogel composed of aligned microfibers. **c** Self-curving behavior of the anisotropic composite hydrogel composed of parallel fiber orientation. The digital image (up) displayed a tube structure derived from a piece of dried anisotropic composite hydrogel (with a structure as schematic in b) reabsorbed water. Cross-sectional optical image (down) of the tube structure above-mentioned. The semi-embedded structured PVA/MF-CH with orientated fiber alignment leads to a self-crimping feature, caused by planar nonuniform swelling field [S1-S3] and interlayer

forces of PVA constituent in the microfiber semi-embedded structure when the dried PVA/MF-CH film is placed into a water bath.

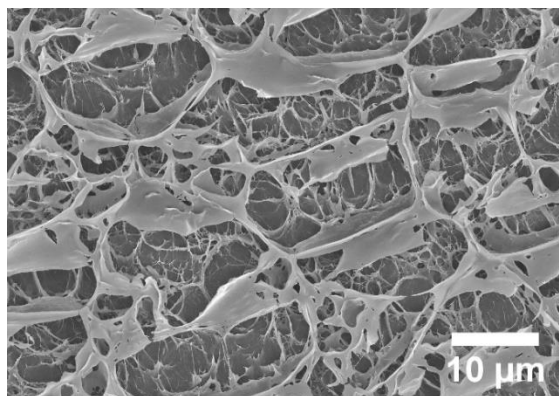

**Fig. S7** SEM image of the surface morphology of PVA/MF-CH with 3.0 k (10 s) rotation process.

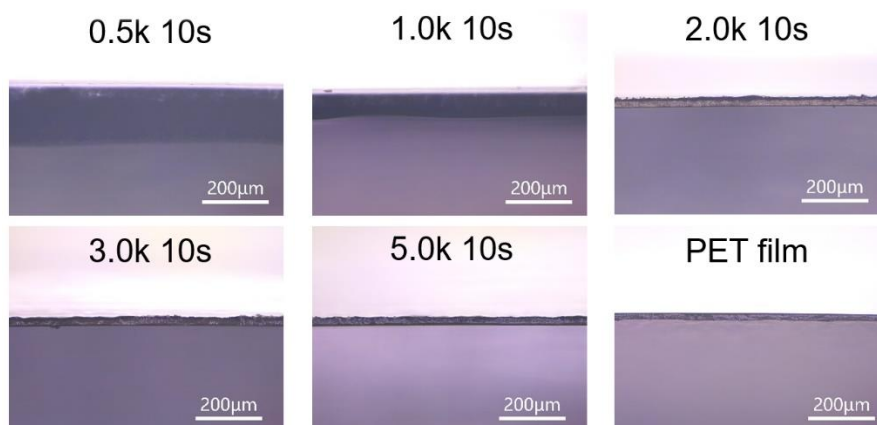

**Fig. S8** Cross-sectional optical images of PVA/MF-CHs processed with different rotation rates attached to a PET film (50 μm)

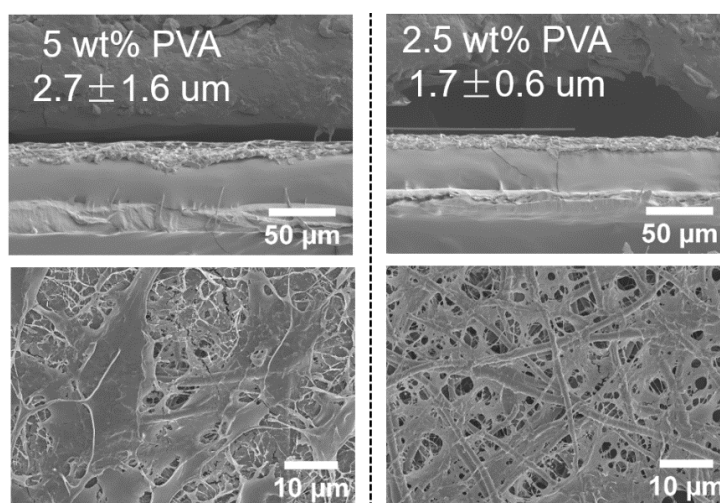

**Fig. S9** The SEM images of PVA/MF-CHs derived from different concentrations of PVA solution. Up ones: cross-section; down ones: surface morphology

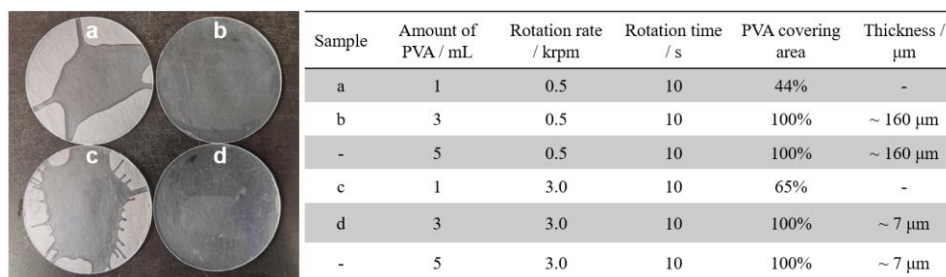

**Fig. S10** Effect of the amount of PVA solution used on microfiber composite hydrogels. Optical images of microfiber composite hydrogels with different amounts of PVA solution after spin-coating process (left) and their corresponding preparation parameters (right table). The diameter of the glass plate is 3 inches

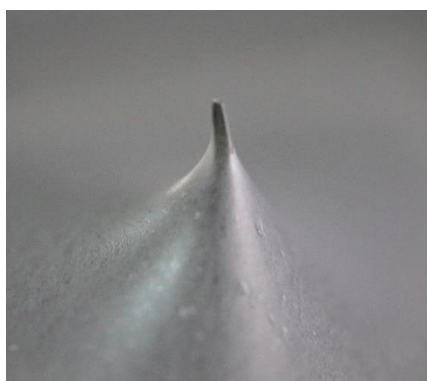

**Fig. S11** Digital image displays the puncturing resistance of PVA/MF-CH

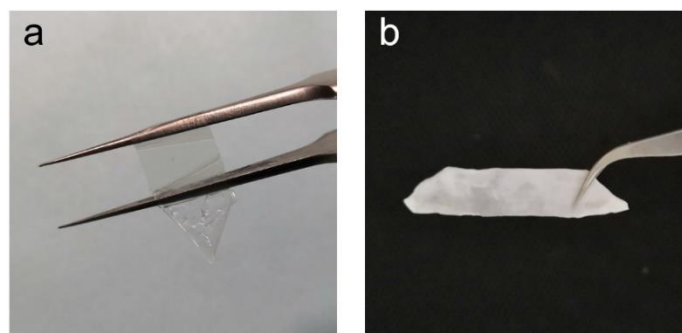

**Fig. S12** Freezing behavior of PVA/MF/Gly-CH (a) and PVA/MF-CH (b)

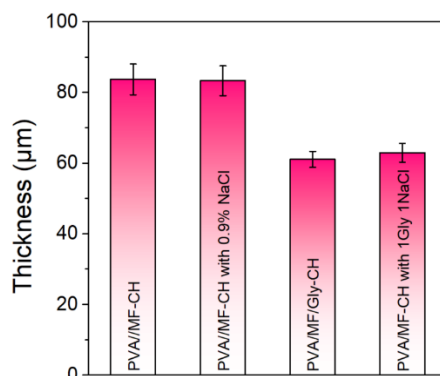

**Fig. S13** Thickness of PVA/MF-CH contented of different constituents. The used concentration of NaCl was 0.9 wt%

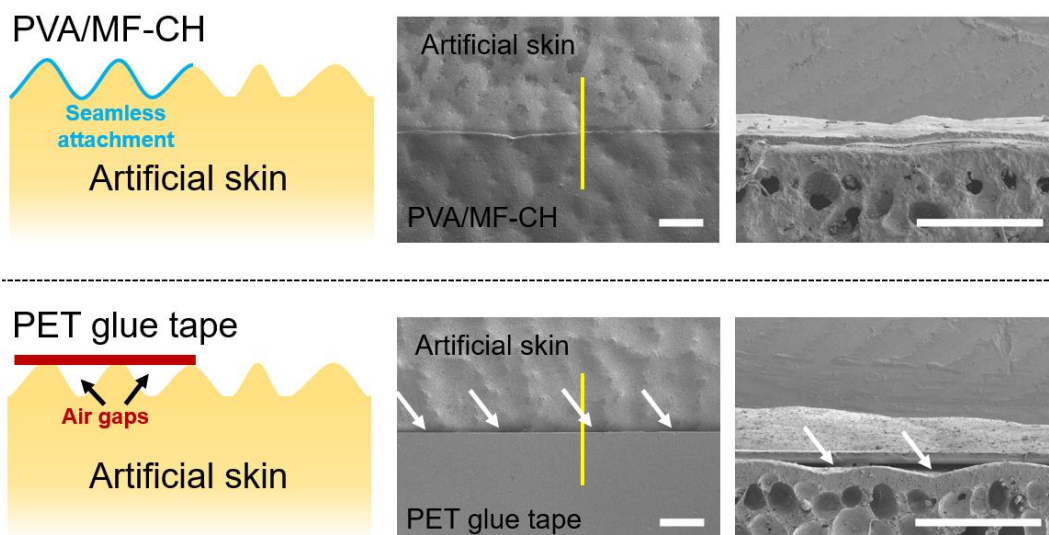

**Fig. S14** Schematic diagrams and SEM images of the artificial skins covered by PVA/MF-CH and PET glue tape, respectively. Arrows point to air gaps. Yellow lines are the measuring regions of Fig. 4a in the main text. All scale bars are 500  $\mu\text{m}$ .

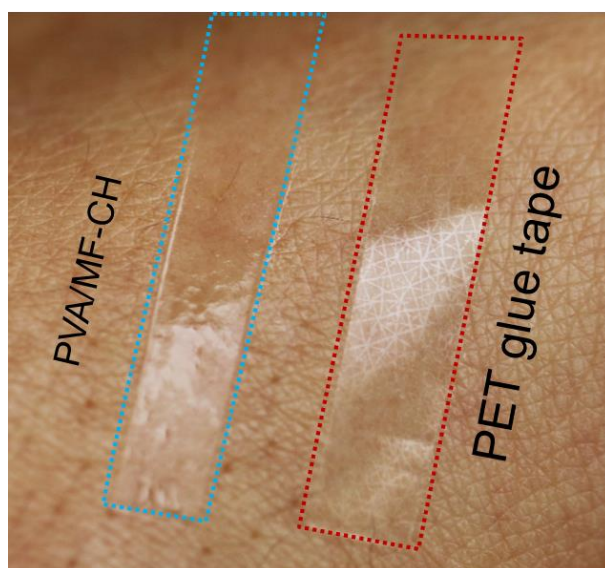

**Fig. S15** Digital image of skin covered by PVA/MF-CH and PET glue tape

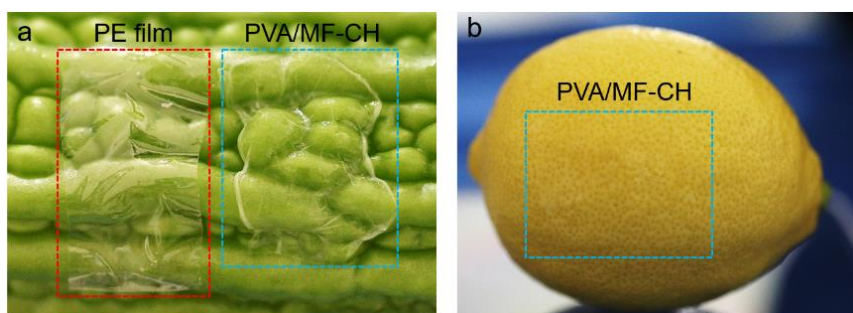

**Fig. S16** Conformal behavior of PVA/MF-CH ( $\sim 80 \mu\text{m}$ ) with objects possessing different surface roughness. Attaching to the surface of a *Momordica charantia* (a) and a lemon (b). A PE film ( $20 \mu\text{m}$ ) is as a contrast

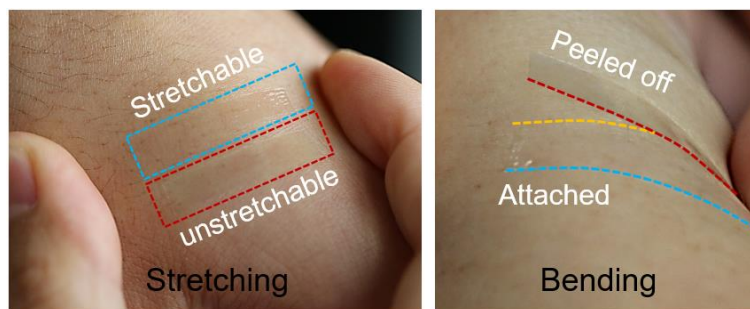

**Fig. S17** Digital images of PVA/MF-CH (in the blue area) under deformation behaviors induced by stretching and bending the local skin. A PET glue tape (in the red area) was used as a contrast.

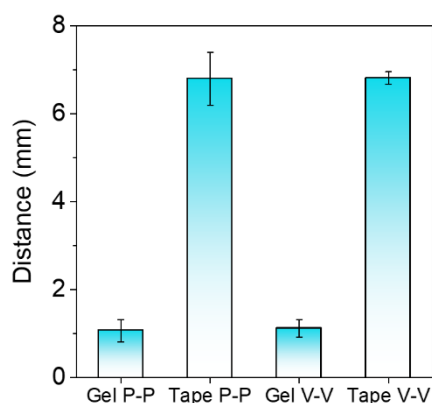

**Fig. S18** Distance between wrinkles of PVA/MF-CH and PET glue tape. Here Gel presents the PVA/MF-CH and the Tape is the PET glue tape of 50  $\mu\text{m}$ .

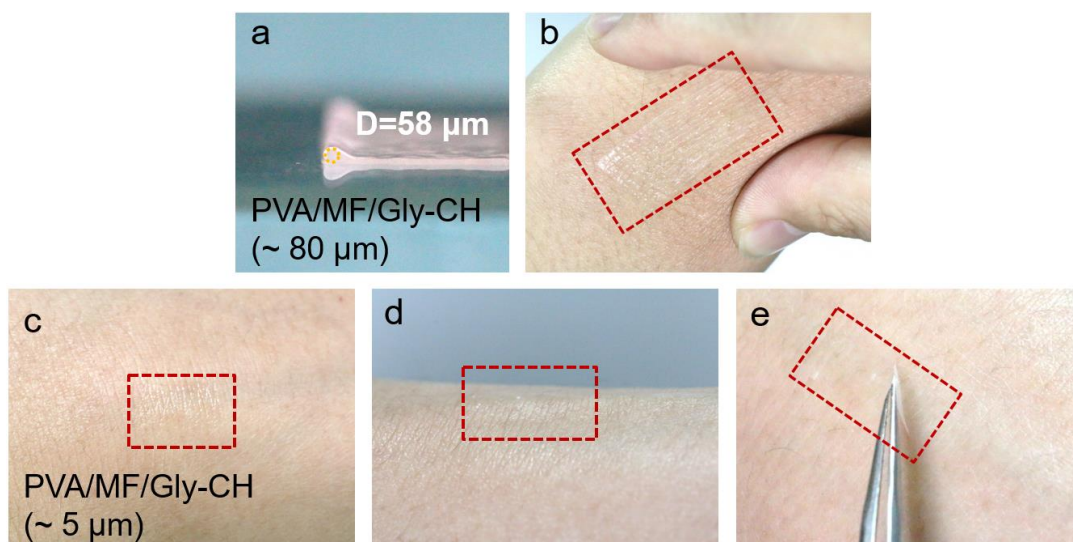

**Fig. S19** **a** Digital images of bending diameters generated from a PVA/MF/Gly-CH with a thickness of  $\sim 80 \mu\text{m}$ . Specimen size: 1 cm (L)  $\times$  0.5 cm (W). **b** Digital image displaying wrinkles generated from a PVA/MF/Gly-CH with a thickness of  $\sim 80 \mu\text{m}$  induced by squeezing the skin. **c** (top view) and **d** (side view) Digital images of a PVA/MF/Gly-CH with a thickness of  $\sim 5 \mu\text{m}$  attached to the skin. **e** Digital image displaying a PVA/MF/Gly-CH with a thickness of  $\sim 5 \mu\text{m}$  detached from the skin

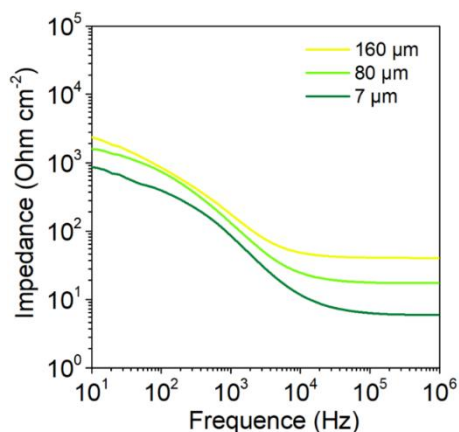

**Fig. S20** Electrochemical impedance of PVA/MF-CH of different thicknesses

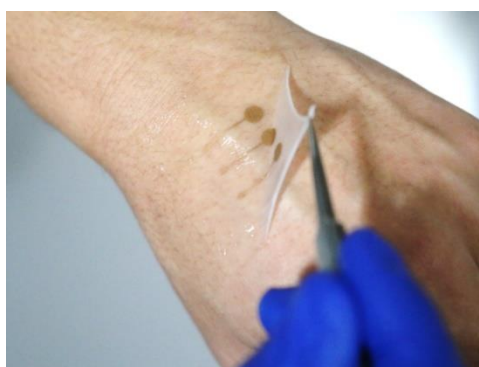

**Fig. S21** Digital image of detaching PVA/MF-CH-based bioelectrode from the skin

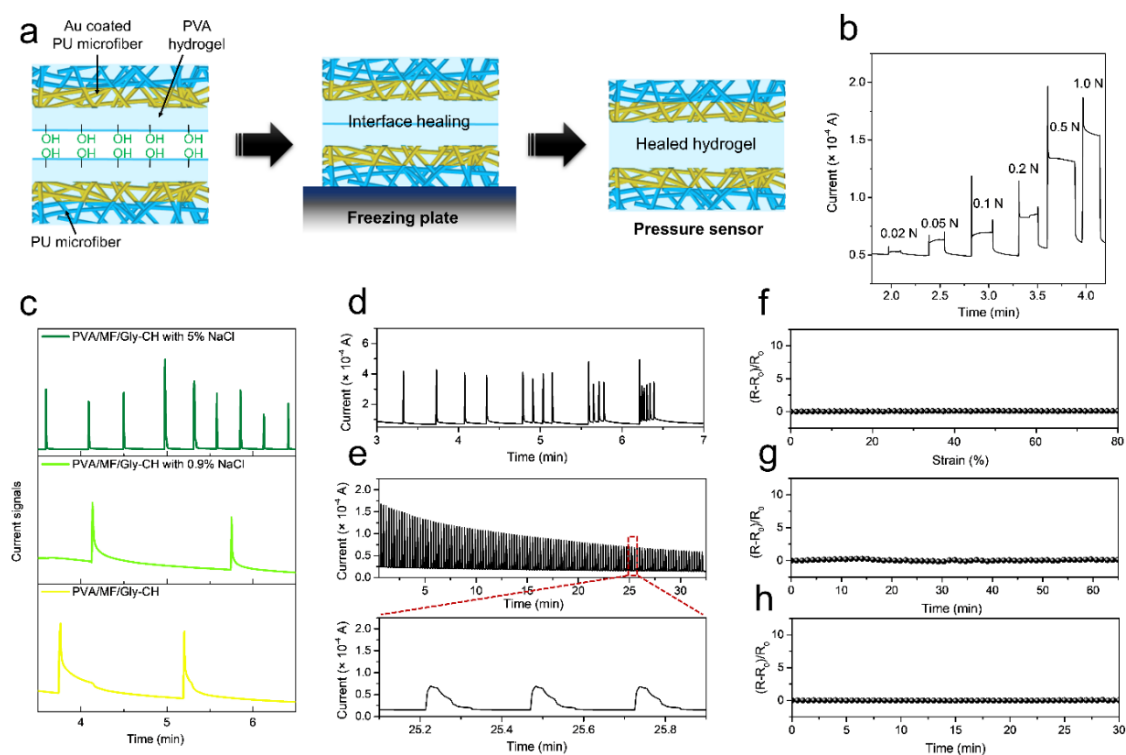

**Fig. S22 a** Schematic fabrication of a pressure sensor based on PVA/MF/Gly-CH-based bioelectrode. **b** The response of the pressure sensor based on PVA/MF/Gly-CH-based



bioelectrode to different loads. **c** The relaxation time of PVA/MF/Gly-CH-based bioelectrode with different concentrations of NaCl. **d** Sensing behavior of the pressure sensor based on PVA/MF/Gly-CH-based bioelectrode pressed by a finger at different rates. **e** Performance durability of the pressure sensor based on PVA/MF/Gly-CH-based bioelectrode. **f** Resistance change of the pressure sensor based on PVA/MF/Gly-CH-based bioelectrode under different strains. **g** Resistance stability of the pressure sensor based on PVA/MF/Gly-CH-based bioelectrode: 10% strain, 100 cycles. **h** Resistance stability of the pressure sensor based on PVA/MF/Gly-CH-based bioelectrode: holding 10% strain for 30 min

**Table S1** Impedance of microfiber composite hydrogels in different time duration

| Sample                     | Time     | Frequency / Hz  |                       |                       |                 |                 |
|----------------------------|----------|-----------------|-----------------------|-----------------------|-----------------|-----------------|
|                            |          | 10 <sup>1</sup> | 10 <sup>2</sup>       | 10 <sup>3</sup>       | 10 <sup>4</sup> | 10 <sup>5</sup> |
| PVA/MF-CH                  |          | 10950           | 1292                  | 151.7                 | 73.6            | 66.5            |
| PVA/MF-CH with 0.9 % NaCl  |          | 743.1           | 184.7                 | 39.1                  | 7.4             | 2.1             |
| PVA/MF-CH with 5 % NaCl    |          | 314.2           | 110.4                 | 20.5                  | 2.6             | 1.0             |
| PVA/MF-CH with Gly         | original | 2889            | 678.5                 | 396.2                 | 334.8           | 306.3           |
| PVA/MF-CH with 2Gly 1 NaCl |          | 1501            | 352                   | 96.9                  | 62.4            | 54.3            |
| PVA/MF-CH with 1Gly 1 NaCl |          | 1300            | 255.8                 | 59.5                  | 24.3            | 19.4            |
| PVA/MF-CH with 1Gly 2 NaCl |          | 1014            | 198.1                 | 44.6                  | 10.9            | 6.7             |
| PVA/MF-CH with 5 % NaCl    |          |                 | 2.0 × 10 <sup>9</sup> | 7.0 × 10 <sup>6</sup> | 371800          | 21100           |
| PVA/MF-CH with Gly         | 12 h     | 1628            | 502.4                 | 276.7                 | 248             | 229.1           |
| PVA/MF-CH with 2Gly 1 NaCl |          | 1754            | 522.4                 | 277.8                 | 247.8           | 230.8           |
| PVA/MF-CH with 1Gly 1 NaCl |          | 1588            | 453.8                 | 177.8                 | 147.1           | 136.8           |
| PVA/MF-CH with 1Gly 2 NaCl |          | 1967            | 556.2                 | 156.2                 | 88.8            | 78.8            |
| PVA/MF-CH with 5 % NaCl    |          |                 | 1.0 × 10 <sup>8</sup> | 2.9 × 10 <sup>6</sup> | 19960           | 5494            |
| PVA/MF-CH with Gly         | 48 h     | 6959            | 1833                  | 813.6                 | 654.1           | 555.8           |
| PVA/MF-CH with 2Gly 1 NaCl |          | 4944            | 1030                  | 350.2                 | 288.3           | 265.6           |
| PVA/MF-CH with 1Gly 1 NaCl |          | 4687            | 1040                  | 303.8                 | 234.7           | 218.8           |
| PVA/MF-CH with 1Gly 2 NaCl |          | 3019            | 657                   | 172.1                 | 114.7           | 105.5           |

## Supplementary References

- [S1] L. Liu, A. Ghaemi, S. Gekle, S. Agarwal, One-component dual actuation: Poly (NIPAM) can actuate to stable 3D forms with reversible size change. *Adv. Mater.* **28**(44), 9792-9796 (2016). <https://doi.org/10.1002/adma.201603677>
- [S2] L. Liu, S. Jiang, Y. Sun, S. Agarwal, Giving direction to motion and surface with ultra-fast speed using oriented hydrogel fibers. *Adv. Funct. Mater.* **26**(7), 1021-1027 (2016). <https://doi.org/10.1002/adfm.201503612>
- [S3] T. Chen, H. Bakhshi, L. Liu, J. Ji, S. Agarwal, Combining 3d printing with electrospinning for rapid response and enhanced designability of hydrogel actuators. *Adv. Funct. Mater.* **28**(19), 1800514 (2018). <https://doi.org/10.1002/adfm.201800514>
